# Supplementary material for: Extracellular vesicles derived from induced pluripotent stem cells mediate anti- inflammatory effects in primary human macrophages
Source: Research Square preprint supplement (doi:10.21203/rs.3.rs-7436803/v1), 2025-08-29
Supplement: Supplementary file 1 [file 8056a3c1280e940dffca186f.docx]

**Supplemental Table 1:** SYBR and TaqMan Assays used for mRNA and miR qRT-PCRanalysis.

| **Probes** | **Species** | **Chemistry** | **Assay ID/Sequence** |
| --- | --- | --- | --- |
| **-mRNA Expression** |  |  |  |
| *IL-10* | Human | SYBR | F: 5’-GCCTAACATGCTTCGAGATC-3’  R: 5’-TGATGTCTGGGTCTTGGTTC-3’ |
|  |  |  |  |
| *TNFA* | Human | SYBR | F: 5’-CTCGAACCCCGAGTGACA-3’  R: 5’-GCTGCCCCTCAGCTTGAG-3’ |
|  |  |  |  |
| *CCL2* | Human | TaqMan | Hs00234140_m1 |
| *MRC1* | Human | TaqMan | HGNC ID:7228 |
| *CXCL8* | Human | TaqMan | HS00174103_m1 |
| *AZU1* | Human | TaqMan | Hs00156049_m1 |
| *NANOG* | Human | SYBR | F: 5’-ATCTGCTTATTCAGGACAGCCC-3’  R: 5’-GAAGTGGGTTGTTTGCCTTTG-3’ |
| *OCT4* | Human | SYBR | F: 5’-AAGAACATGTGTAAGCTGCGGC-3’  R: 5’-CATTGTTGTCAGCTTCCTCCAC-3’ |
| *SOX2* | Human | TaqMan | Hs04260357_g1 |
| *GAPDH (VICTM Dye)* | Human | TaqMan | Hs99999905_m1 |
| **-miRNA Expression** |  |  |  |
| hsa-miR-155-5p | Human | TaqMan | 002623 |
| hsa-miR-21-5p | Human | TaqMan | 000397 |
| hsa-let7c | Human | TaqMan | 000379 |
| Sn RNU6 | Human, Mouse | TaqMan | 001973 |

**Supplemental Table 2:** List of miRNA assays included in TaqMan™ OpenArray™ Human Advanced microRNA panels.

| **miRNA** | **Assay Code** | **miRNA** | **Assay Code** | **miRNA** | **Assay Code** |
| --- | --- | --- | --- | --- | --- |
| ath-miR-159a | 478411 | miR-31-5p | 478015 | miR-145-5p | 477916 |
| let-7a-5p | 478575 | miR-32-5p | 478026 | miR-146a-5p | 478399 |
| let-7b-3p | 478221 | miR-34a-3p | 478047 | miR-146b-5p | 478513 |
| let-7b-5p | 478576 | miR-34a-5p | 478048 | miR-148a-3p | 477814 |
| let-7c-5p | 478577 | miR-34b-5p | 478050 | miR-148b-3p | 477824 |
| let-7e-5p | 478579 | miR-34b-3p | 478049 | miR-150-5p | 477918 |
| let-7f-2-3p | 477843 | miR-34c-3p | 478051 | miR-151a-3p | 477919 |
| let-7f-5p | 478578 | miR-34c-5p | 478052 | miR-151a-5p | 478505 |
| let-7g-5p | 478580 | miR-92a-3p | 477827 | miR-153-3p | 477922 |
| let-7i-5p | 478375 | miR-92b-3p | 477823 | miR-155-5p | 477927 |
| miR-1-3p | 477820 | miR-93-5p | 478210 | miR-181a-5p | 477857 |
| miR-9-5p | 478214 | miR-99a-3p | 479224 | miR-181b-5p | 478583 |
| miR-9-3p | 478211 | miR-99b-5p | 478343 | miR-181c-5p | 477934 |
| miR-10a-5p | 479241 | miR-100-3p | 478619 | miR-181d-5p | 479517 |
| miR-10b-5p | 478494 | miR-100-5p | 478224 | miR-183-3p | 477936 |
| miR-15a-5p | 477858 | miR-101-3p | 477863 | miR-185-5p | 477939 |
| miR-15b-5p | 478313 | miR-103a-3p | 478253 | miR-186-5p | 477940 |
| miR-17-5p | 478447 | miR-103a-2-5p | 477864 | miR-190a-5p | 478358 |
| miR-19a-3p | 479228 | miR-106b-3p | 477866 | miR-191-3p | 477951 |
| miR-19b-3p | 478264 | miR-106b-5p | 478412 | miR-191-5p | 477952 |
| miR-20a-5p | 478586 | miR-107 | 478254 | miR-193a-5p | 477954 |
| miR-21-5p | 477975 | miR-122-5p | 477855 | miR-194-5p | 477956 |
| miR-22-3p | 477985 | miR-124-3p | 477879 | miR-195-5p | 477957 |
| miR-23a-3p | 478532 | miR-125a-5p | 477884 | miR-196a-5p | 478230 |
| miR-23b-3p | 478602 | miR-125a-3p | 477883 | miR-199a-3p | 477961 |
| miR-24-3p | 477992 | miR-125b-5p | 477885 | miR-199a-5p | 478231 |
| miR-25-3p | 477994 | miR-126-5p | 477888 | miR-200c-3p | 478351 |
| miR-26a-5p | 477995 | miR-127-3p | 477889 | miR-203a-3p | 478316 |
| miR-26b-5p | 478418 | miR-128-3p | 477892 | miR-204-5p | 478491 |
| miR-27a-3p | 478384 | miR-129-2-3p | 478544 | miR-205-5p | 477967 |
| miR-27b-3p | 478270 | miR-130a-3p | 477851 | miR-206 | 477968 |
| miR-27b-5p | 478789 | miR-132-3p | 477900 | miR-210-3p | 477970 |
| miR-28-5p | 478000 | miR-133a-3p | 478511 | miR-211-5p | 478507 |
| miR-29a-3p | 478587 | miR-133b | 480871 | miR-216a-5p | 477976 |
| miR-29c-5p | 478005 | miR-135a-5p | 478581 | miR-218-5p | 477977 |
| miR-30a-3p | 478273 | miR-137 | 477904 | miR-219a-5p | 477980 |
| miR-30c-1-3p | 479412 | miR-142-3p | 477910 | miR-221-3p | 477981 |
| miR-30c-2-3p | 479401 | miR-142-5p | 477911 | miR-222-3p | 477982 |
| miR-30c-5p | 478008 | miR-143-3p | 477912 | miR-223-3p | 477983 |
| miR-30d-5p | 478606 | miR-144-3p | 477913 | miR-302b-3p | 478591 |
| miR-30e-3p | 478388 | miR-145-3p | 477915 | miR-302d-3p | 478237 |

**Supplemental Table 2 (Continued):** List of miRNA assays included in TaqMan™ OpenArray™ Human Advanced microRNA panels.

| **miRNA** | **Assay Code** | **miRNA** | **Assay Code** | **miRNA** | **Assay Code** |
| --- | --- | --- | --- | --- | --- |
| miR-320a | 478594 | miR-939-5p | 478245 | miR-885-5p | 478207 |
| miR-320b | 478588 | miR-486-5p | 478128 | miR-937-3p | 479212 |
| miR-323a-3p | 477853 | miR-487a-3p | 477826 | miR-1247-5p | 477882 |
| miR-325 | 478025 | miR-489-3p | 478130 | miR-1249-3p | 478654 |
| miR-326 | 478027 | miR-490-3p | 478131 | miR-1260a | 478476 |
| miR-328-3p | 478028 | miR-497-5p | 478138 | miR-1264 | 478670 |
| miR-335-5p | 478324 | miR-501-3p | 478350 | miR-1292-5p | 478691 |
| miR-338-3p | 478037 | miR-502-3p | 478348 | miR-1298-5p | 479452 |
| miR-339-5p | 478040 | miR-505-3p | 478145 | miR-1911-5p | 479583 |
| miR-342-3p | 478043 | miR-513a-5p | 479483 |  |  |
| miR-361-3p | 478055 | miR-515-3p | 478976 |  |  |
| miR-361-5p | 478056 | miR-516b-5p | 478979 |  |  |
| miR-363-3p | 478060 | miR-518d-3p | 479393 |  |  |
| miR-369-3p | 478067 | miR-518e-3p | 479408 |  |  |
| miR-369-5p | 478068 | miR-518f-3p | 478984 |  |  |
| miR-373-3p | 478363 | miR-520h | 479499 |  |  |
| miR-374b-5p | 478389 | miR-523-3p | 478994 |  |  |
| miR-375 | 478074 | miR-524-3p | 479338 |  |  |
| miR-376a-3p | 478240 | miR-525-3p | 478995 |  |  |
| miR-376c-3p | 478459 | miR-532-3p | 478336 |  |  |
| miR-378a-3p | 478349 | miR-532-5p | 478151 |  |  |
| miR-378a-5p | 478076 | miR-548d-5p | 480870 |  |  |
| miR-383-5p | 478079 | miR-548e-3p | 478362 |  |  |
| miR-410-3p | 478085 | miR-548k | 479374 |  |  |
| miR-411-5p | 478086 | miR-548n | 479024 |  |  |
| miR-412-3p | 478087 | miR-551a | 478158 |  |  |
| miR-423-5p | 478090 | miR-570-3p | 479053 |  |  |
| miR-424-5p | 478092 | miR-576-3p | 478164 |  |  |
| miR-425-5p | 478094 | miR-583 | 479065 |  |  |
| miR-448 | 478105 | miR-593-5p | 479077 |  |  |
| miR-449a | 478561 | miR-615-3p | 478175 |  |  |
| miR-449b-5p | 479528 | miR-628-3p | 478181 |  |  |
| miR-450b-3p | 478913 | miR-633 | 479115 |  |  |
| miR-450b-5p | 478914 | miR-642a-5p | 479121 |  |  |
| miR-451a | 478107 | miR-645 | 478188 |  |  |
| miR-452-3p | 478917 | miR-652-3p | 478189 |  |  |
| miR-452-5p | 478109 | miR-653-3p | 479134 |  |  |
| miR-454-3p | 478329 | miR-656-3p | 479137 |  |  |
| miR-455-3p | 478112 | miR-660-5p | 478192 |  |  |
| miR-483-3p | 478122 | miR-664a-3p | 478193 |  |  |
| miR-483-5p | 478432 | miR-770-5p | 479178 |  |  |
| miR-484 | 478308 | miR-876-3p | 479186 |  |  |

**Supplemental Figures**

**
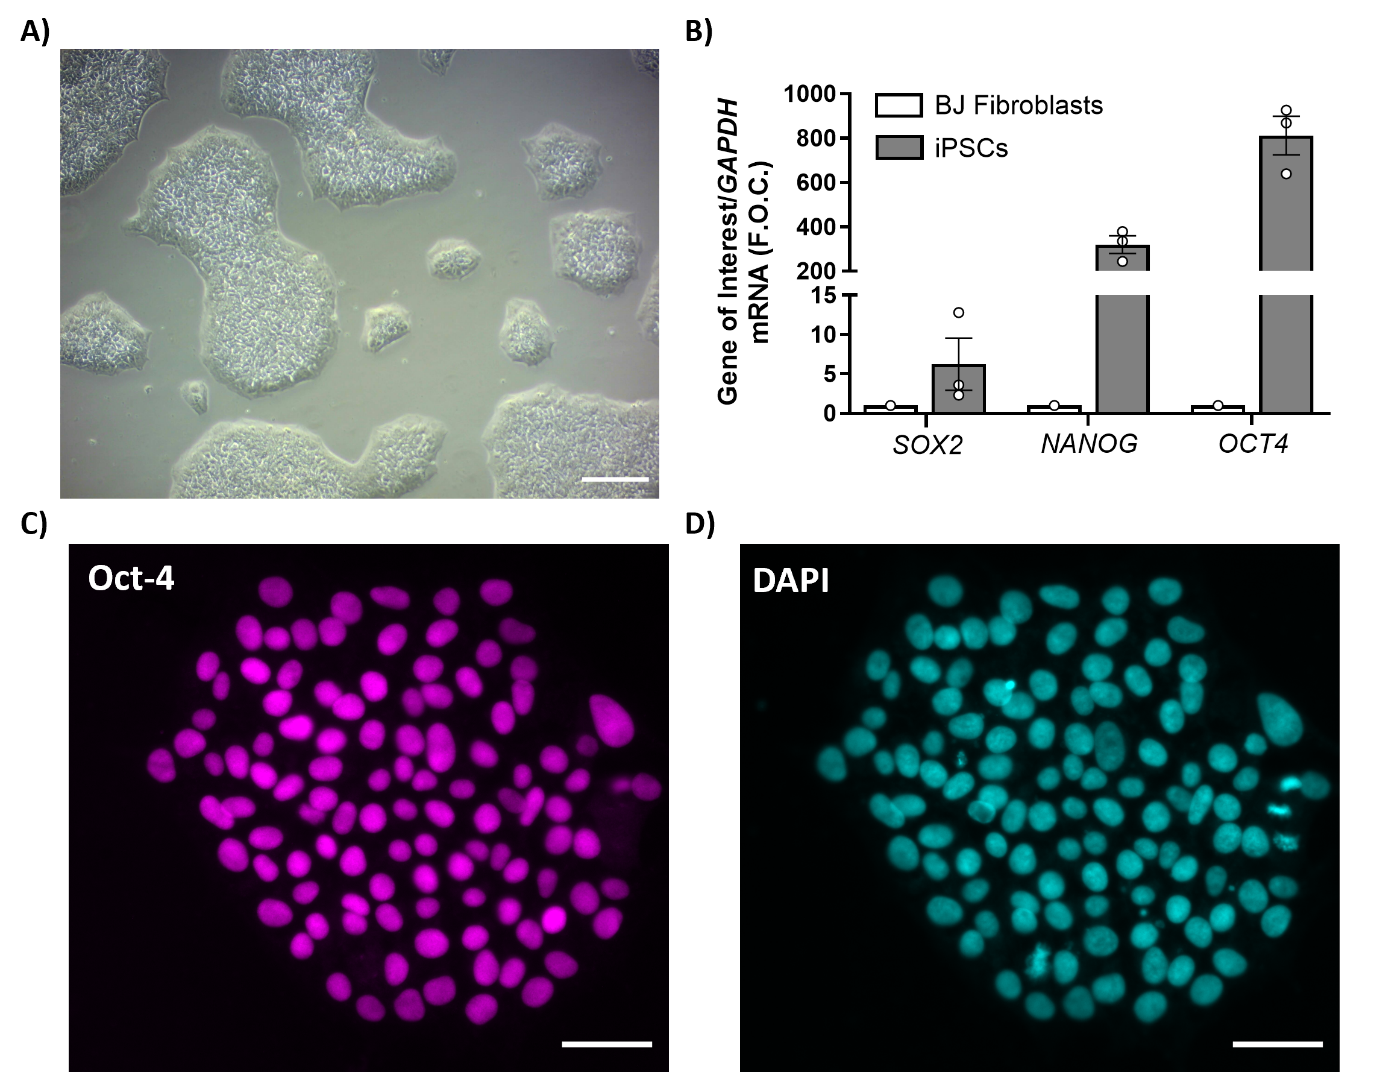
**

**Supplemental Figure 1: iPSC characterization. A)** Brightfield image of iPSC colonies. **B)** Gene expression of the markers of pluripotency, *SOX2*, *NANOG* and *OCT4* in iPSCs (n=3) in comparison to a BJ fibroblast cell line using *GAPDH* as the endogenous control. **C)** iPSCs were positive for Oct-4 and **D)** DAPI was used as the nuclear stain. Scale bar = 50µm.

**
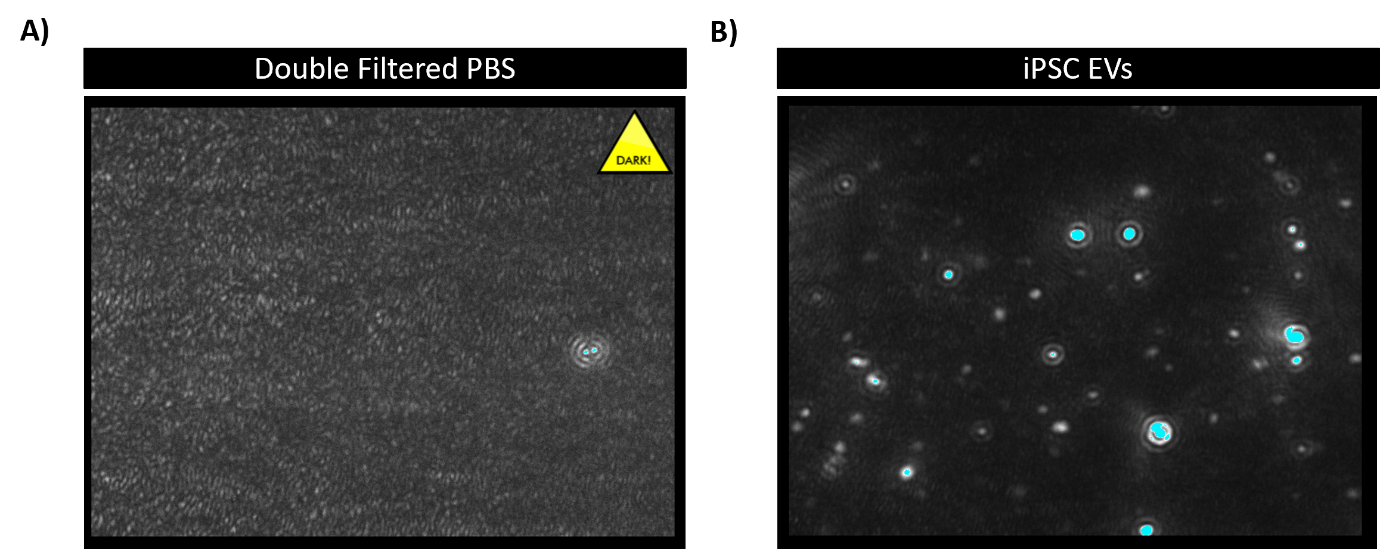
**

**Supplementary Figure 2: Nanoparticle tracking analysis. A)** Field of view image from Nanosight NS300 with double filtered PBS sample injected. **B)** Field of view image from Nanosight NS300 with iPSC EV sample resuspended in double filtered PBS injected. Dots represent particles in solution moving in Brownian motion.

**
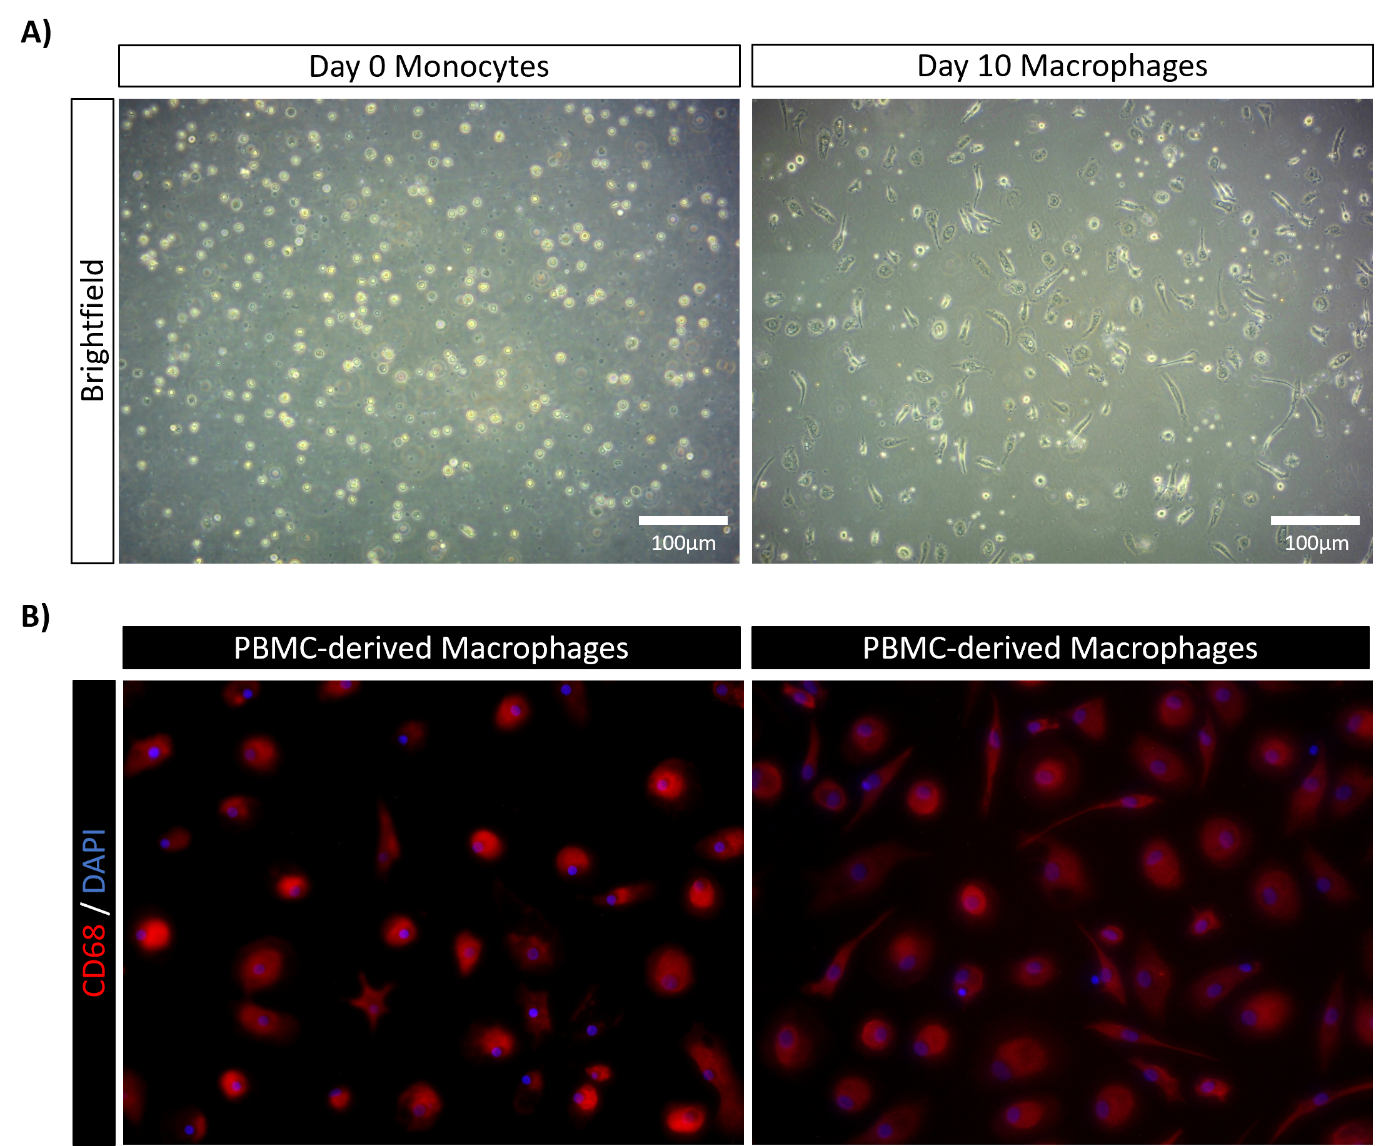
**

**Supplemental Figure 3:** PBMC derived macrophage positive for the pan-macrophage marker CD68. **A)** Monocytes were isolated from PBMCs using plastic adherence and imaged at Day 0 and then cultured for 10 days to differentiate into macrophages. **B)** Day 10 macrophages were positive for CD68.

**
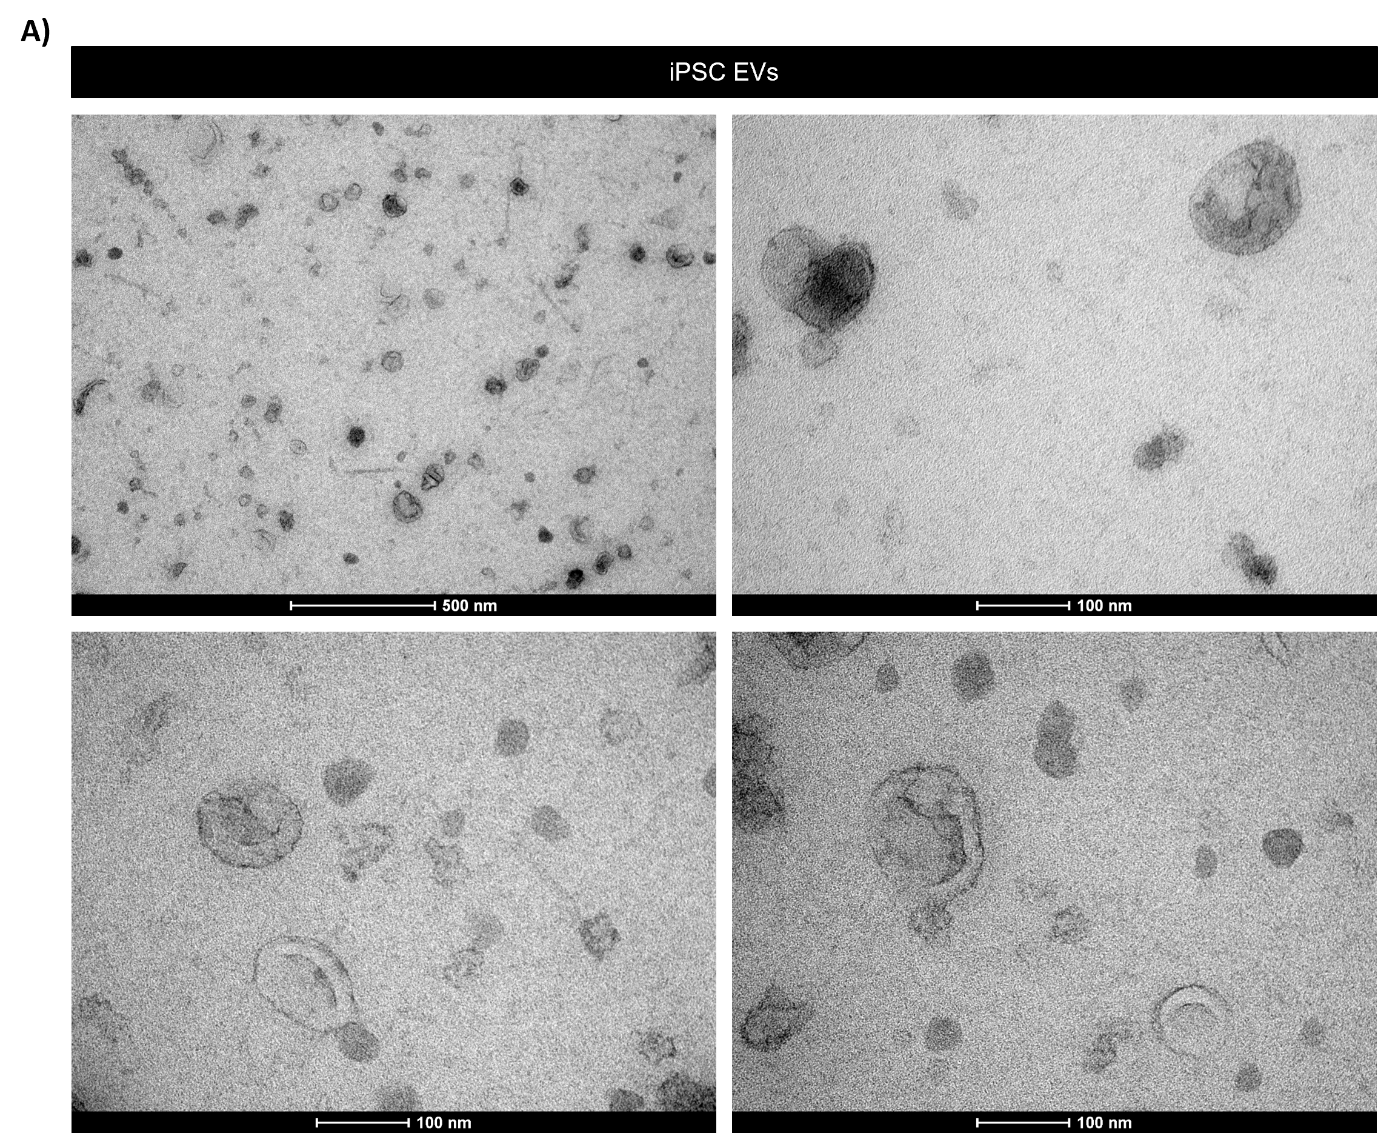
**

**Supplementary Figure 4: Transmission electron microscopy of iPSC-derived EVs. A)** Transmission electron microscopy (TEM) representative images of EVs isolated from the supernatant of iPSCs. EVs have characteristic cup-shaped morphology. An FEI Tecnai 12 Transmission Electron Microscope with the acceleration voltage set at 120 kv was used to image the EVs at a magnification of 43,000X and 135,000X.

**
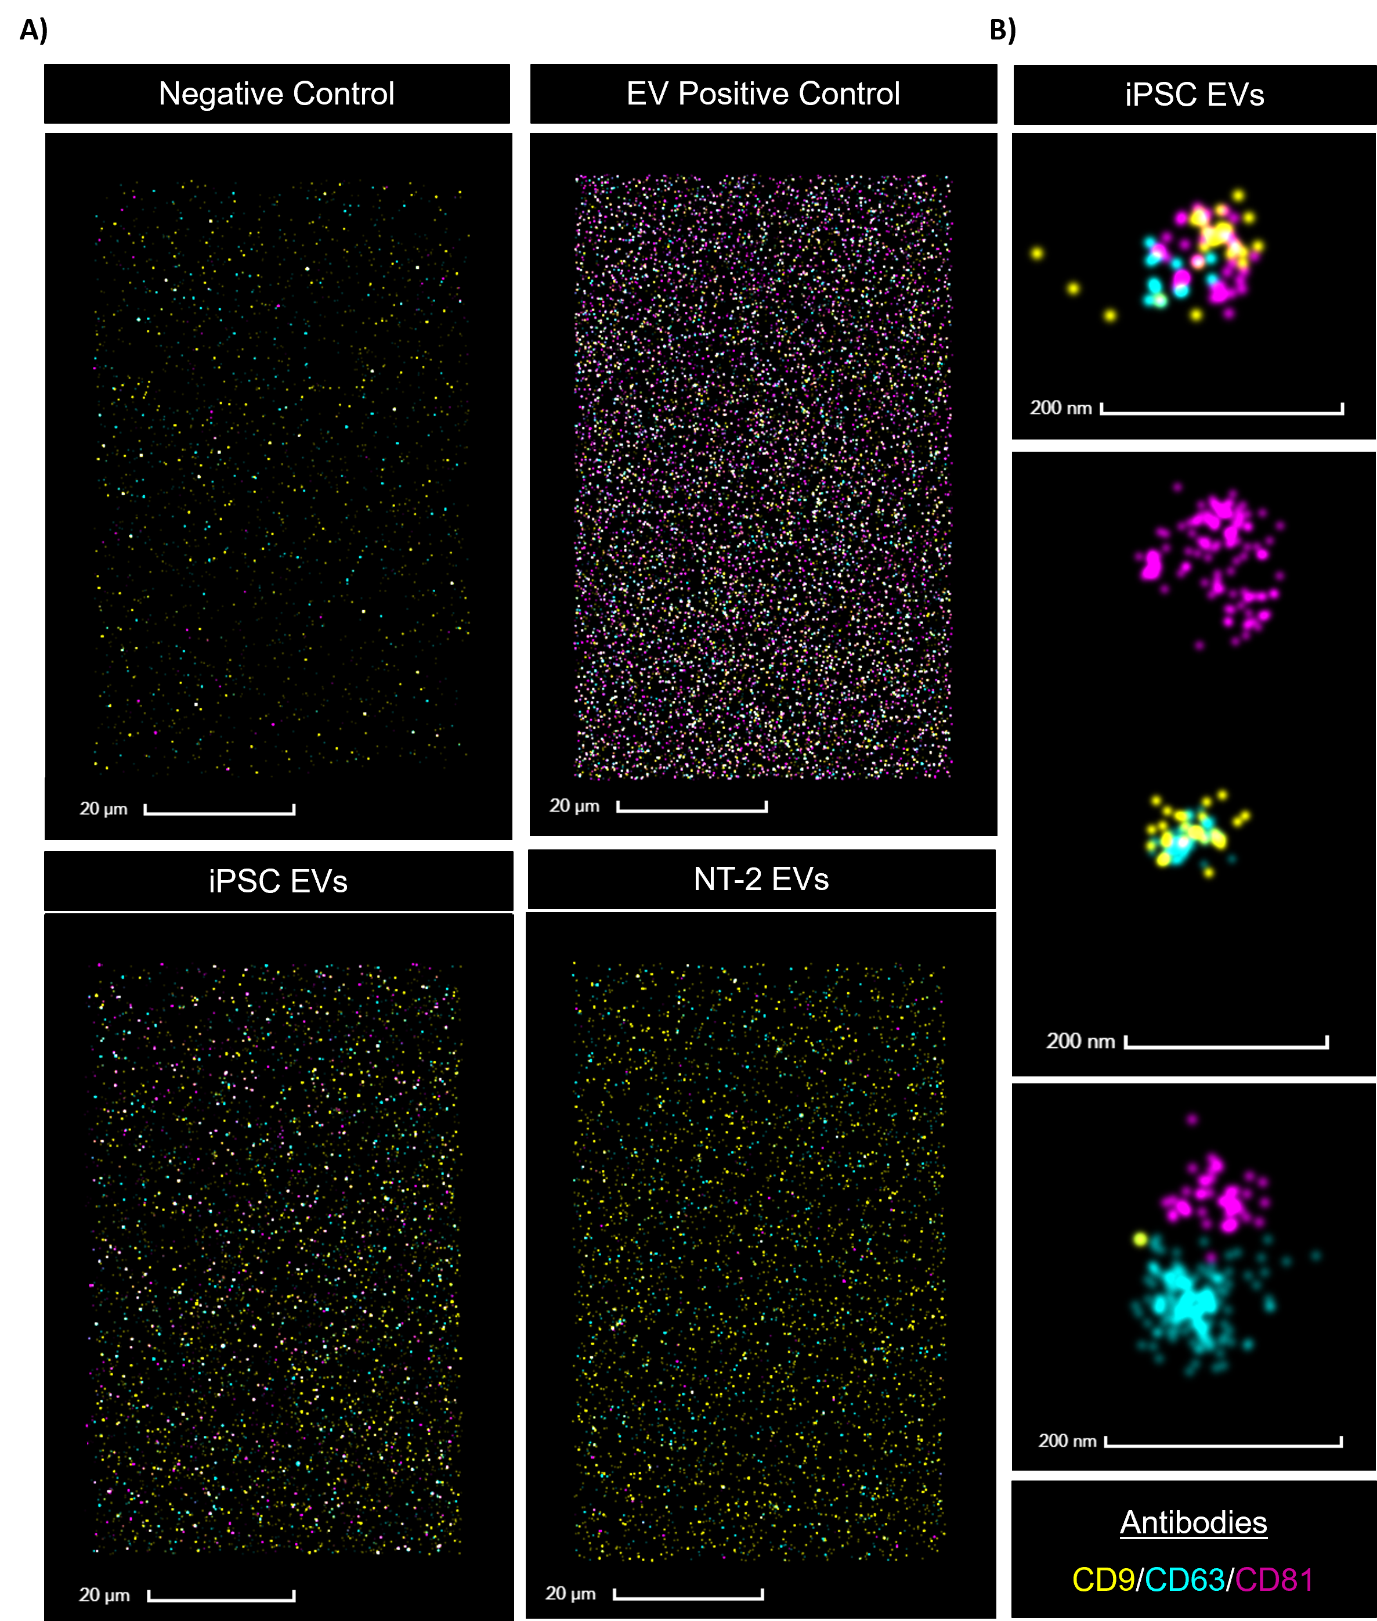
**

**Supplementary Figure 5: Super resolution microscopy of the exosome markers CD9, CD63 and CD81 on EVs.** EV samples were stained with the EV antibody cocktail CD9, CD63 and CD81. Images were generated by dSTORM. **A)** Representative compiled image captured by the NanoImager of the EV Profiler Chip. For generation of the negative control only buffers and antibody cocktail was loaded into the lane on the chip. The standard EV control in the EV Profiler Kit was used as the positive control. Representative images of iPSC EVs and NT-2 EVs positive for the antibodies were also captured. **B)** Additional images of triple positive, double positive and single positive iPSC-EVs.

**
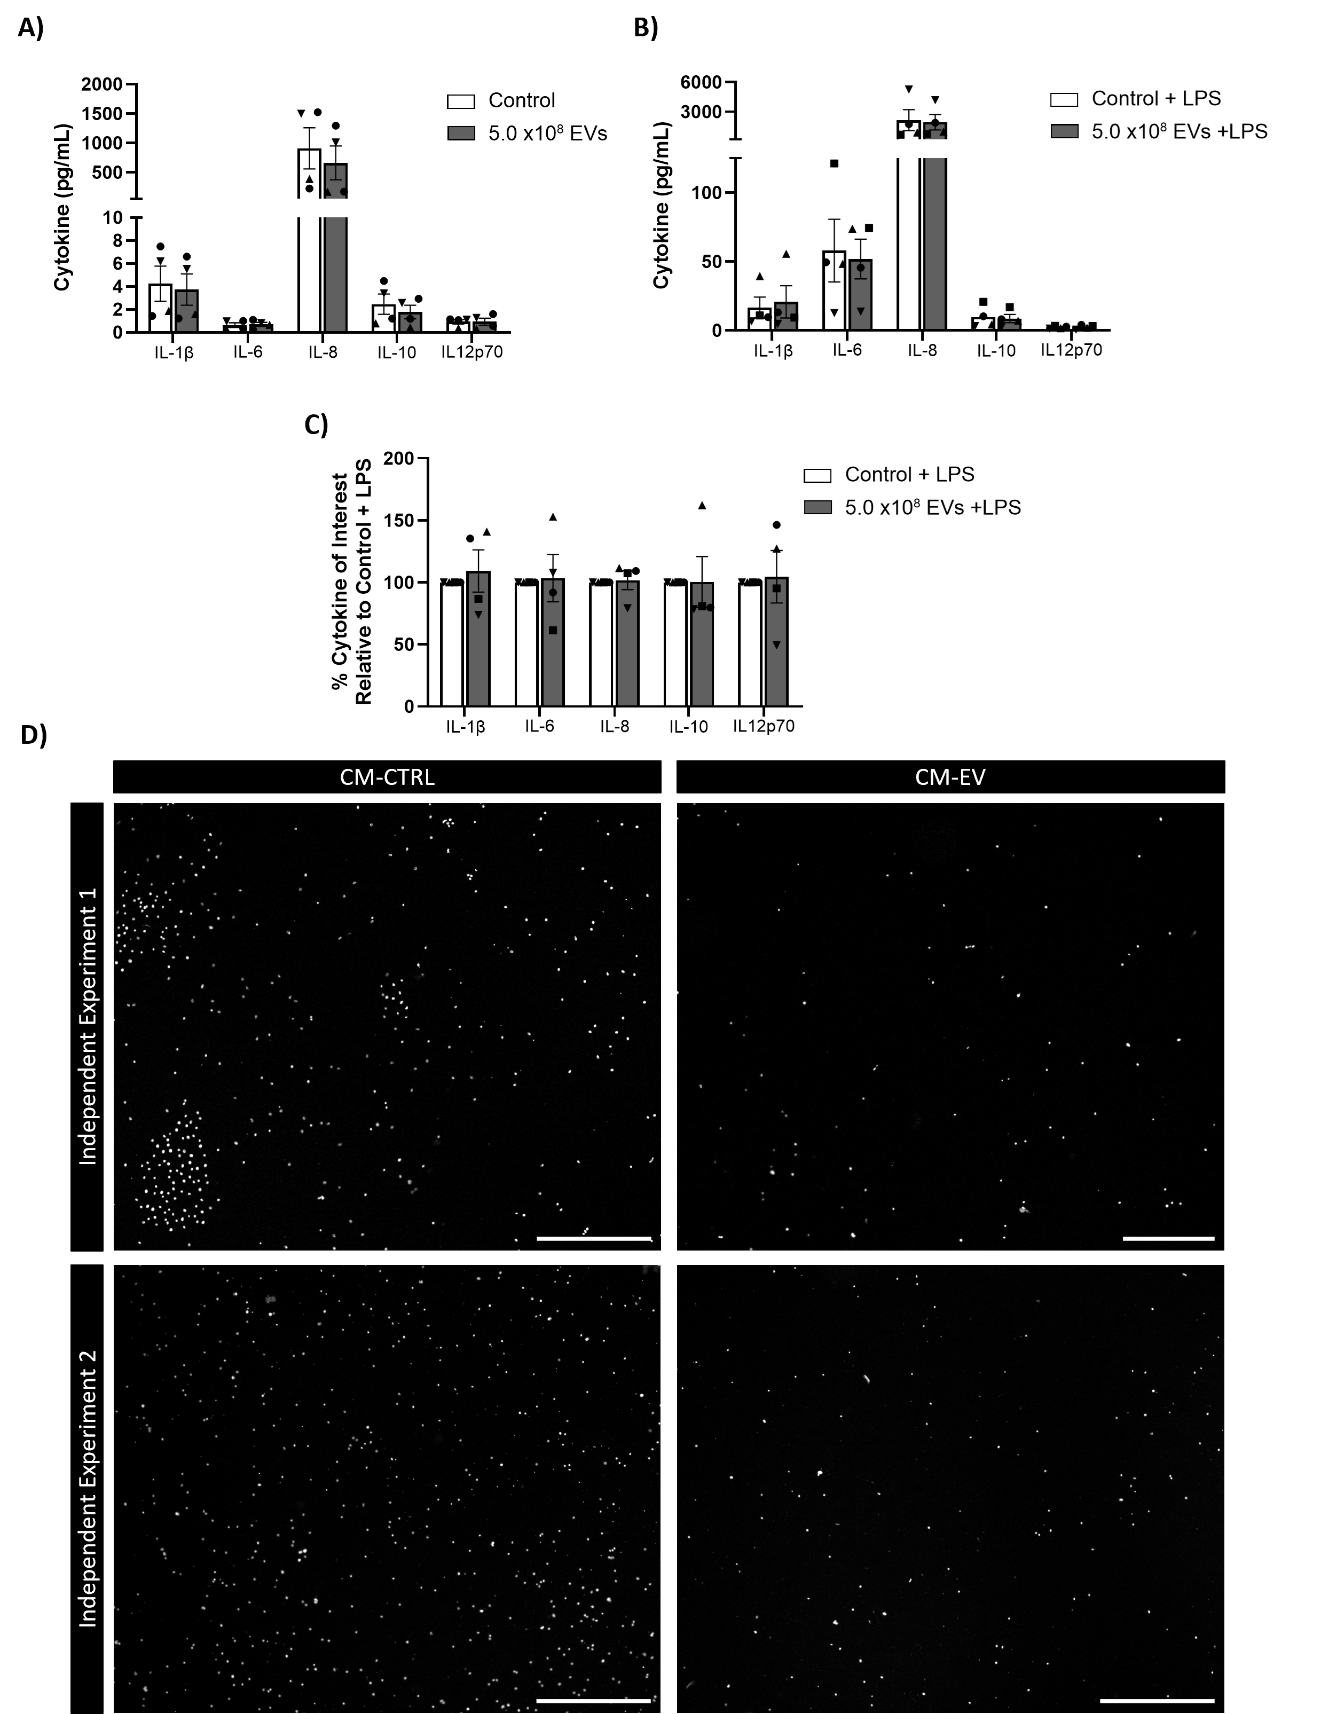
Supplemental Figure 6: Cytokine analysis and chemotactic effects of conditioned media (CM) from macrophages treated with iPSC EVs on THP-1 monocyte migration.** **A-C)** Supernatants from EV treated macrophages stimulated with and without LPS were analysed by MSD assay forthe cytokinesIL-1β, IL-6, IL-8, IL-10 and IL-12p70 were analysed in the cell supernatant by MSD assay and graphed as pg/mL and as percentage relative to control. Symbols represent independent experiments. **D)** Images are representative of two independent experiments testing migratory effects of CM on monocyte migration. Images of polycarbonate membrane transwell inserts obtained using a microscope (5X). White dots are Hoechst positive nuclei indicative of a transmigrating monocyte. Scale bar = 500µm.

**
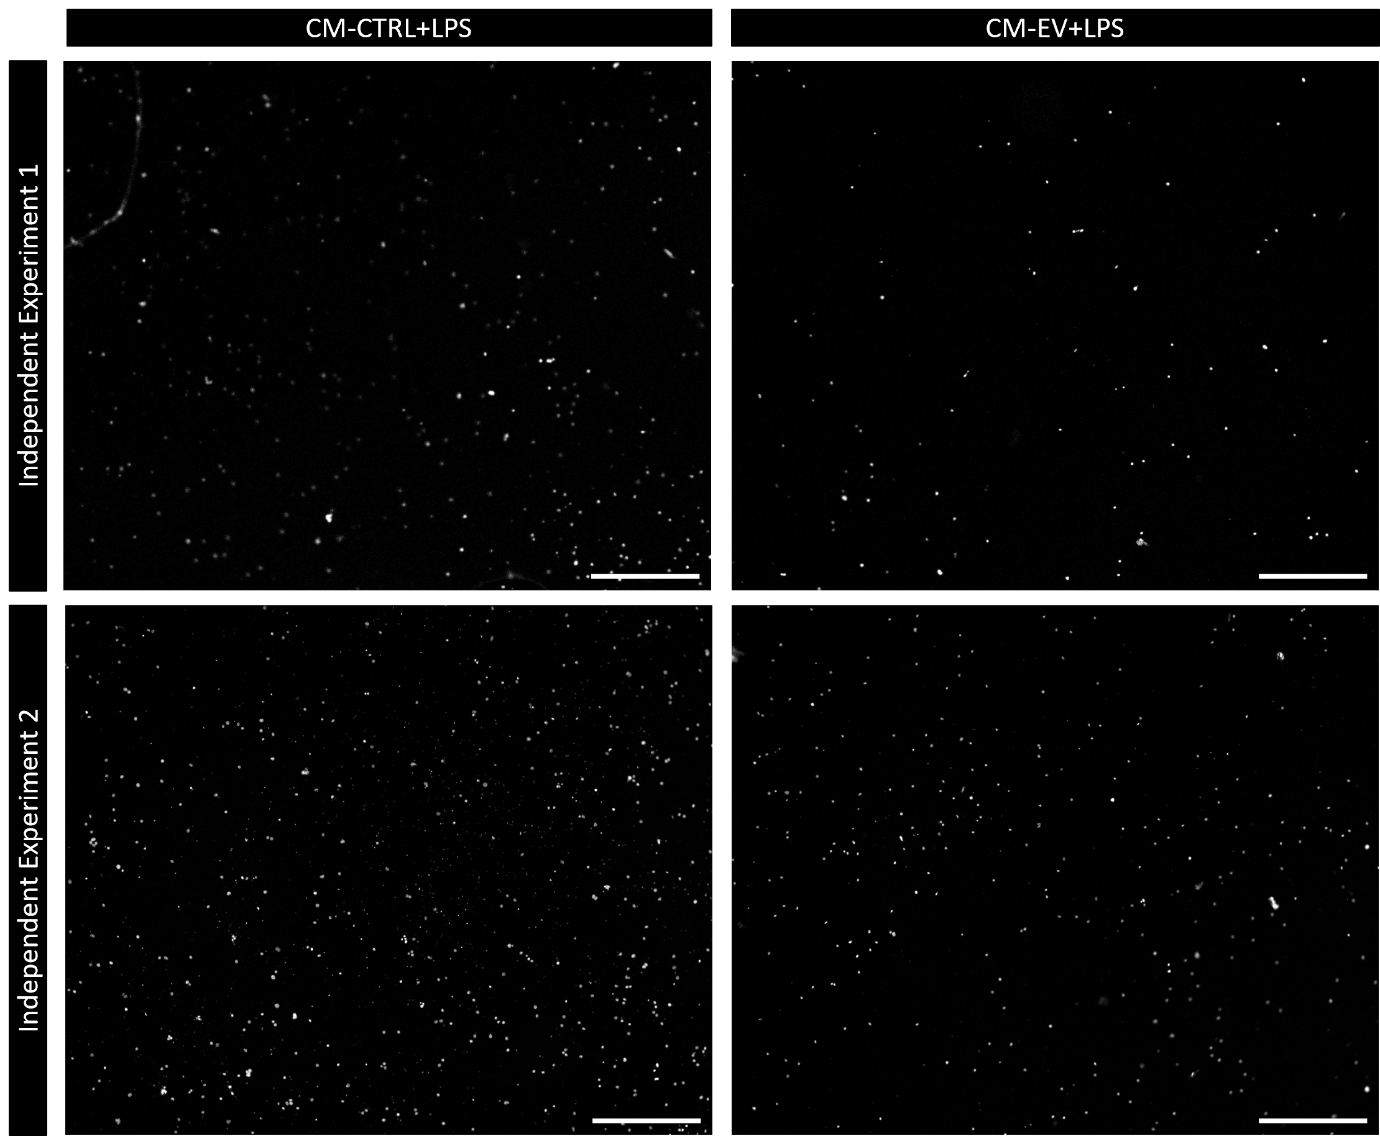
**

**Supplemental Figure 7: Chemotactic effect of conditioned media (CM) from macrophages treated with iPSC EVs and LPS on THP-1 monocyte migration.** Images are representative of two independent experiments. Images of polycarbonate membrane transwell inserts obtained using a microscope (10X). White dots are Hoechst positive nuclei indicative of a transmigrating monocyte. Scale bar = 100µm.

**
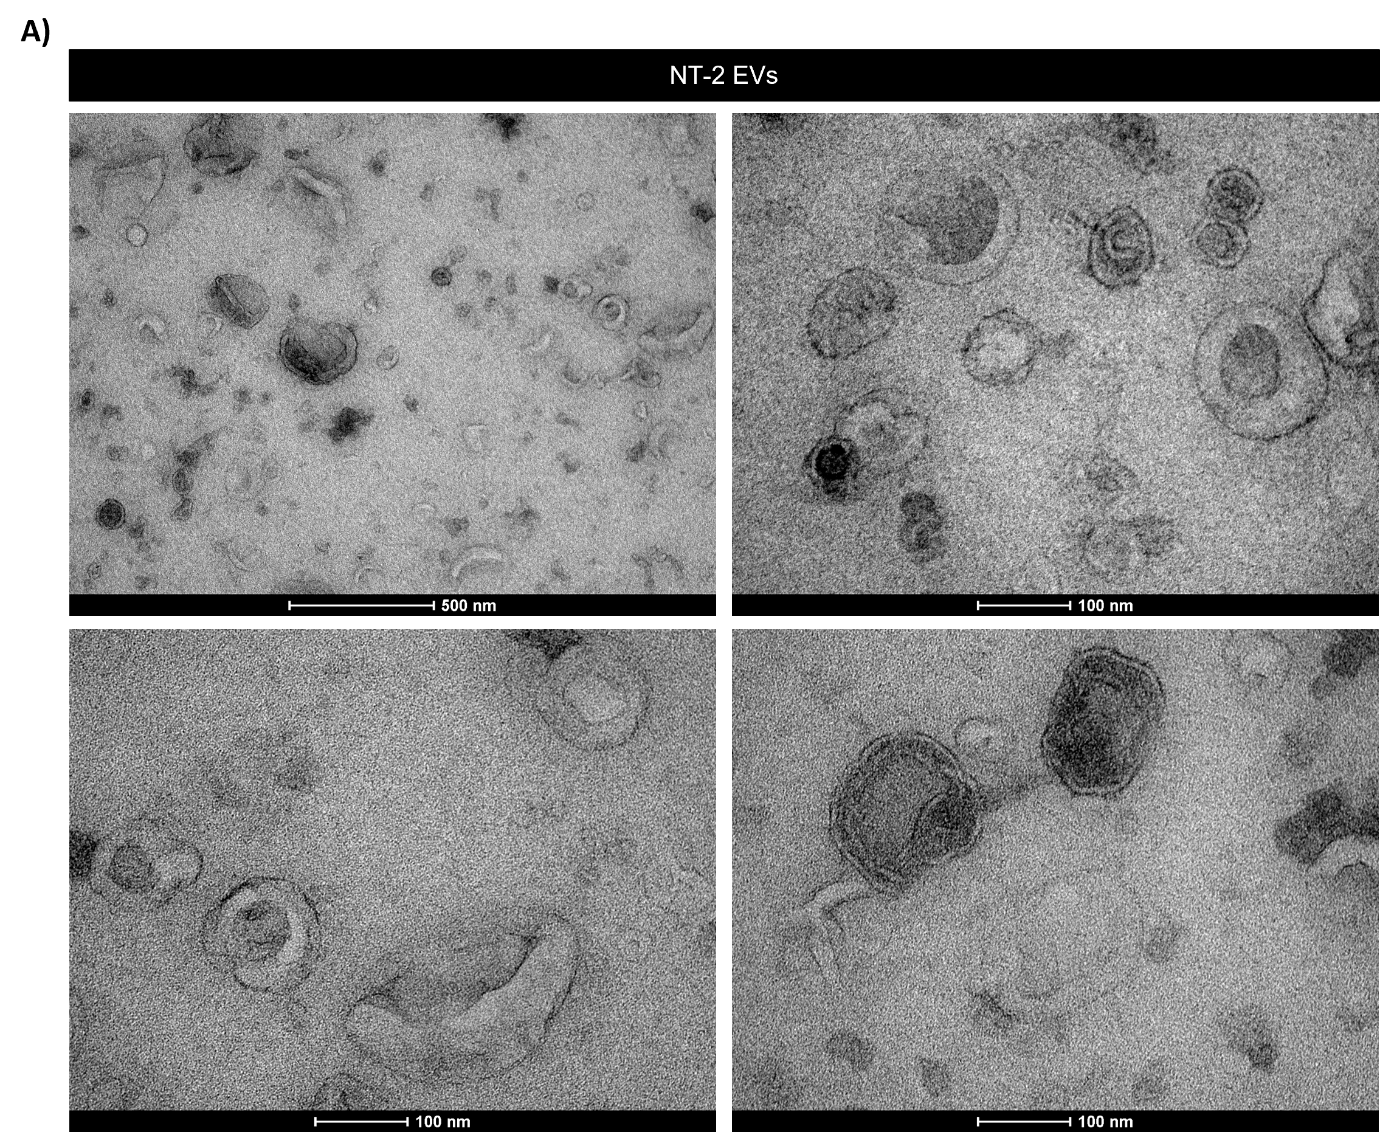
**

**Supplementary Figure 8: Transmission electron microscopy of NT-2-derived EVs. A)** Transmission electron microscopy (TEM) representative images of EVs isolated from the supernatant of NT-2 cells. EVs have characteristic cup-shaped morphology. An FEI Tecnai 12 Transmission Electron Microscope with the acceleration voltage set at 120 kv was used to image the EVs at a magnification of 43,000X and 135,000X.

**
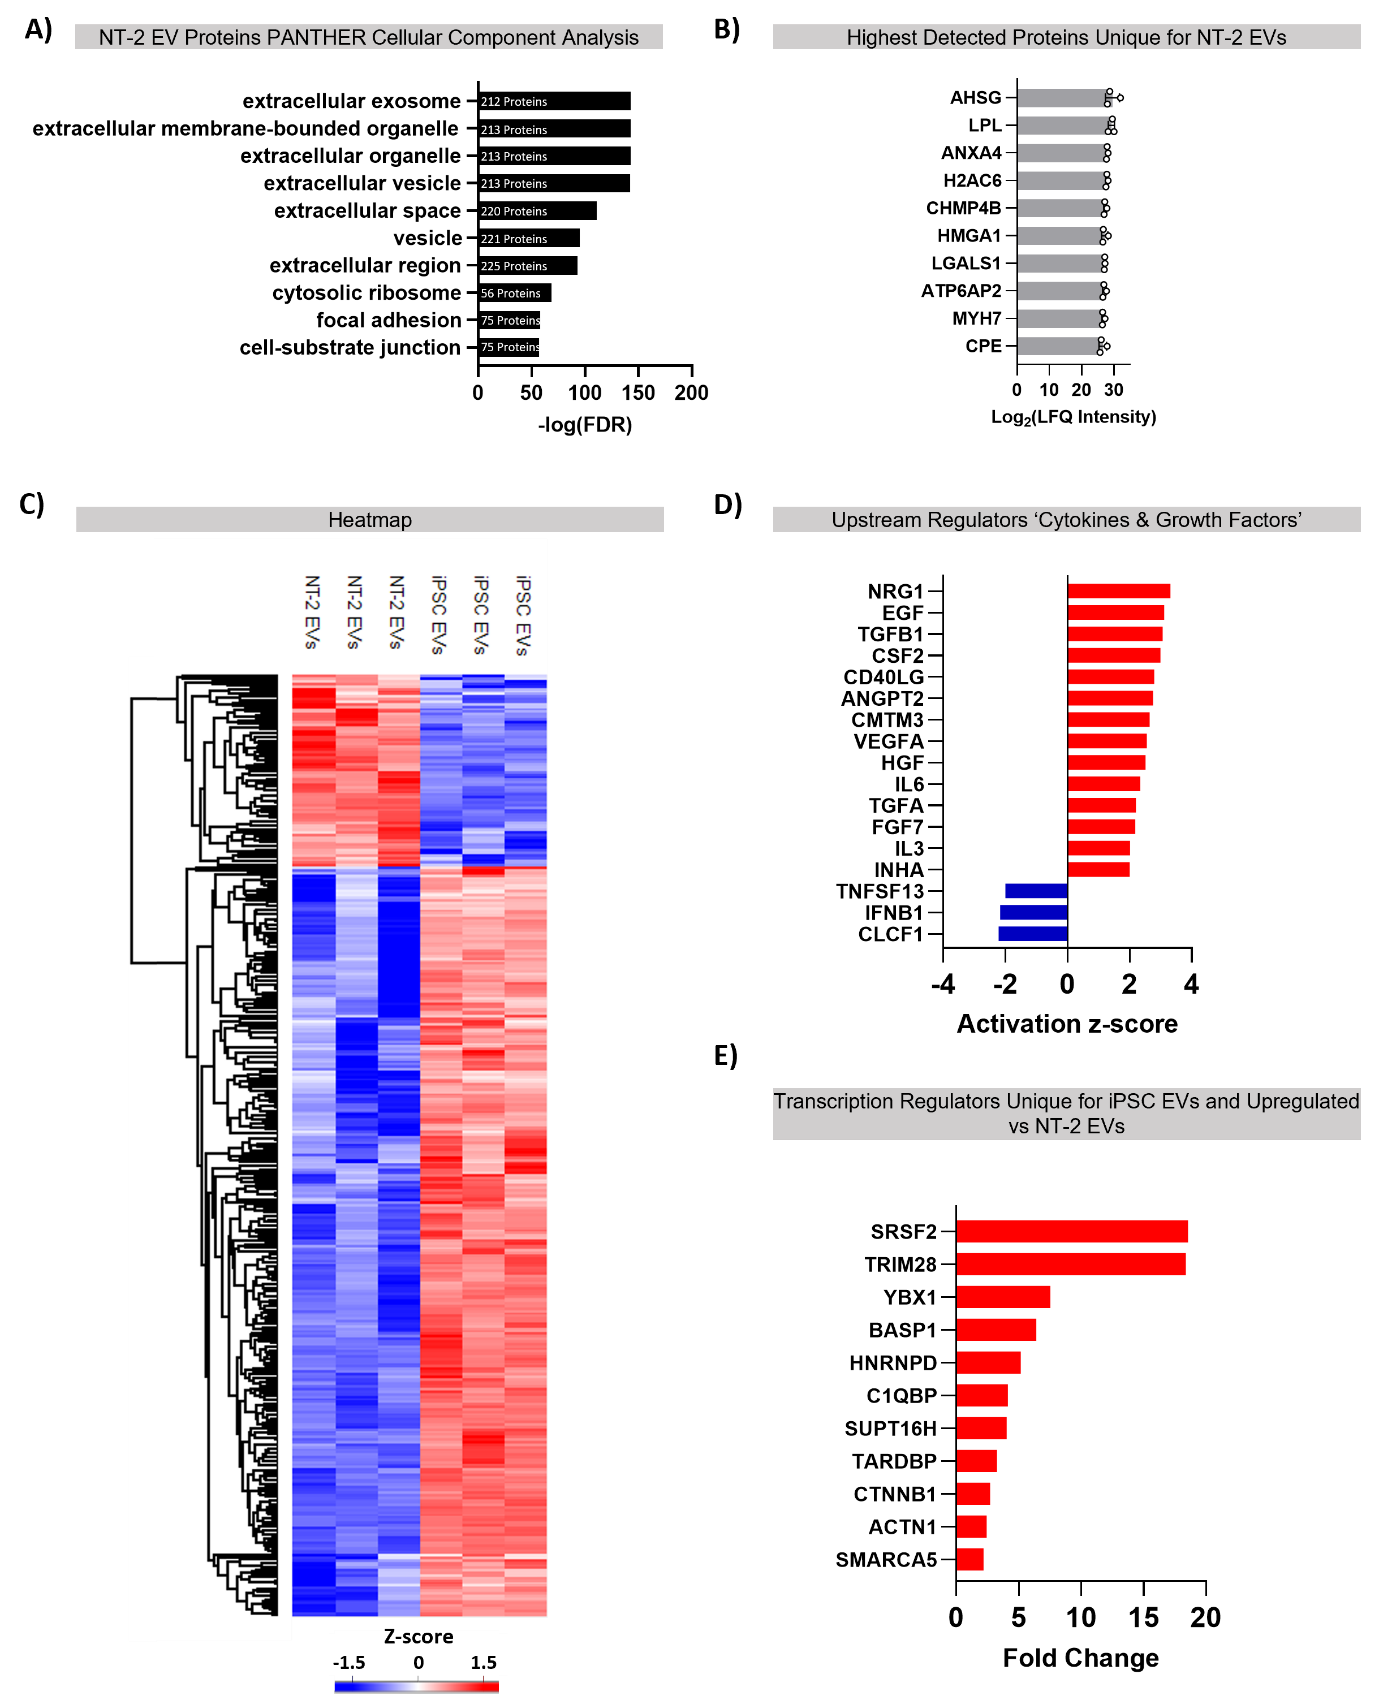
**

**Supplemental Figure 9: A)** Analysis of NT-2 EV proteins by Cellular Component Analysis using PANTHER. **B)** The top 10 most abundant proteins unique to the NT-2 EVs. **C)** A heatmap of the significantly altered proteins between NT-2 EVs and iPSC EVs. **D)** IPA analysis of the significantly altered proteins was used to identify the upstream regulators which was filtered for ‘Cytokines and Growth Factors’. **E)** The fold change of the transcription regulators (identified by IPA molecule analysis) unique for iPSC-EVs and upregulated in comparison to NT-2 EVs were graphed.

**
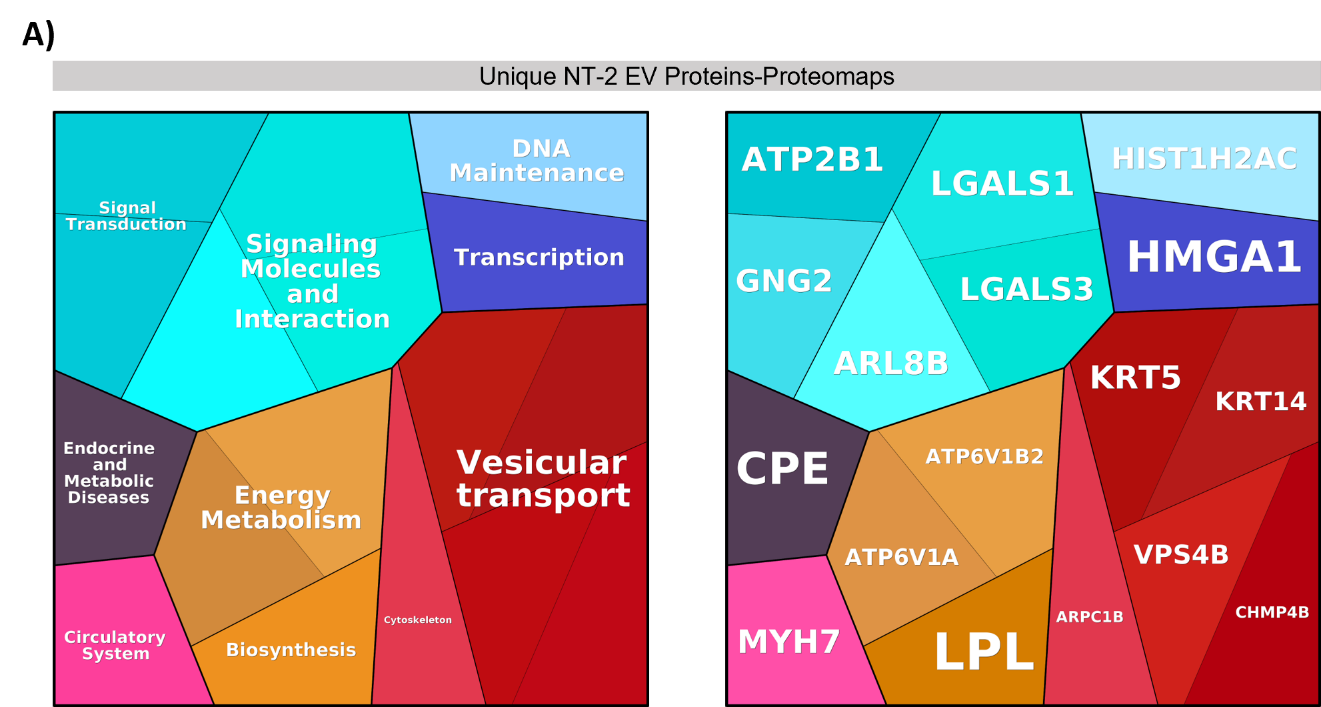
**

**Supplemental Figure 10: A)** Proteins unique to NT-2 EVs were analysed by Proteomaps. Proteomaps coverage of the unique NT-2 EV proteins was 53.1% (17/32).

**
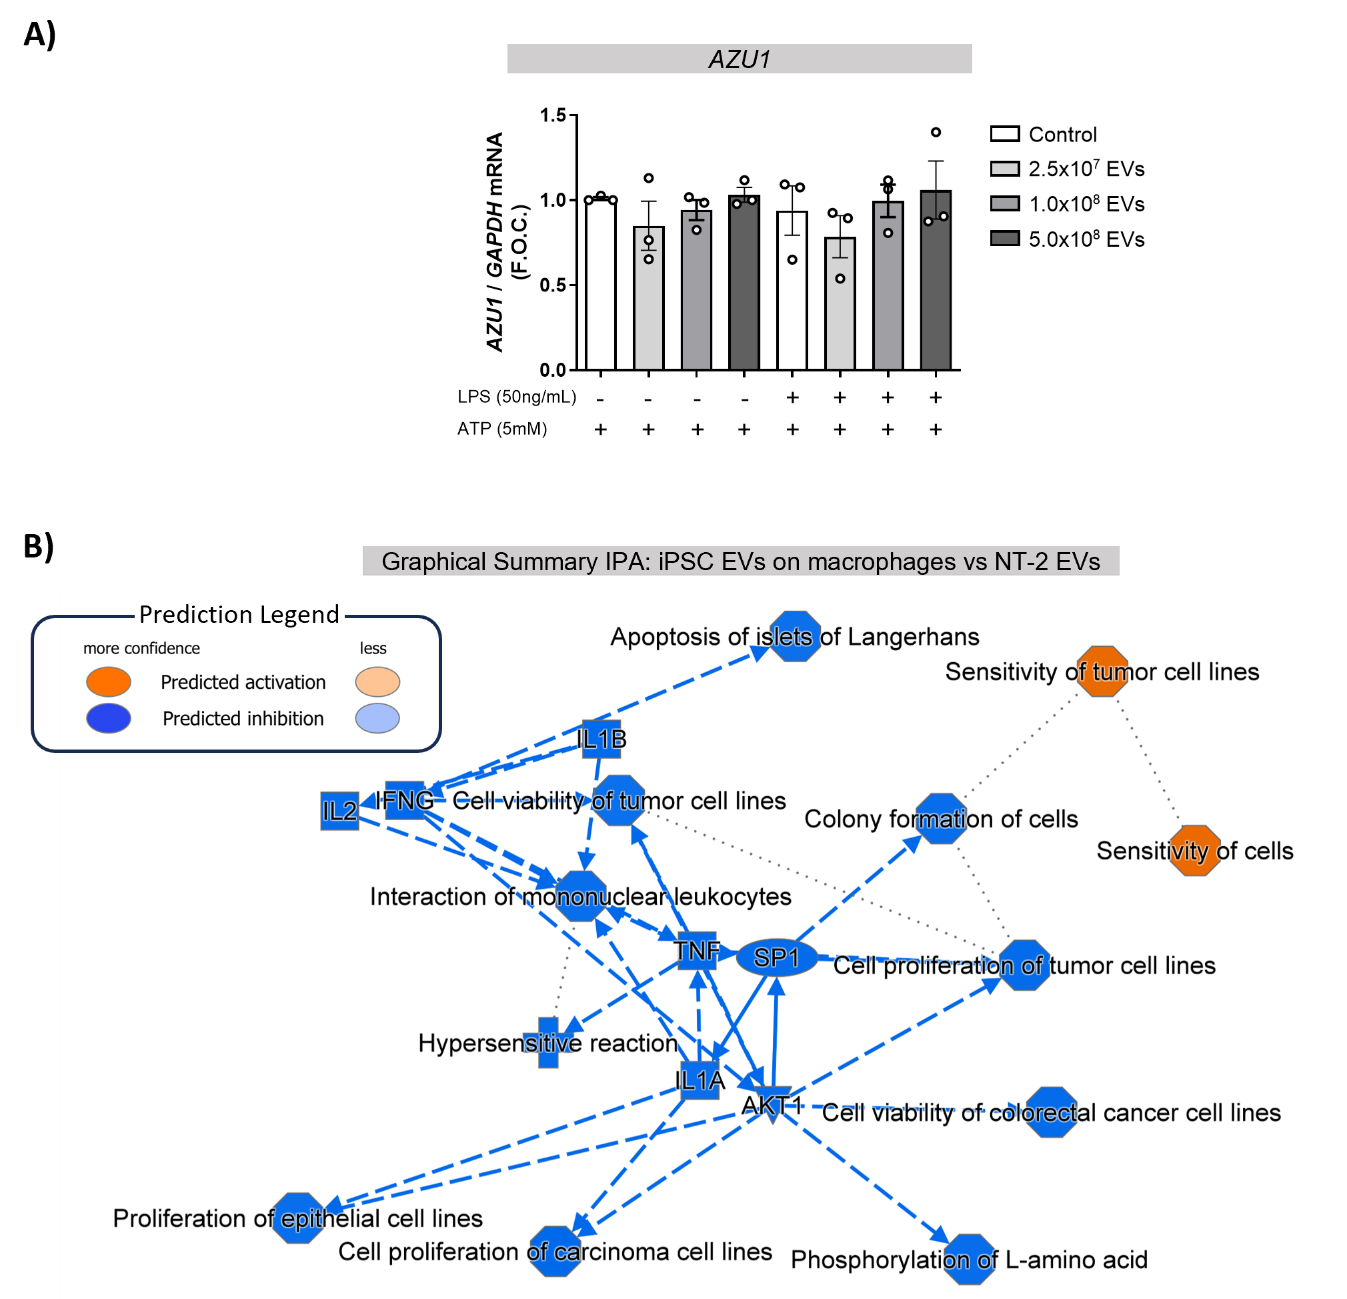
**

**Supplemental Figure 11: A)** *AZU1* gene expression in macrophages treated with iPSC EVs using *GAPDH* as the control. **B)** Graphical summary generated by IPA from analysis of iPSC EV effects on macrophages in comparison to NT-2 EVs.
